# Supplementary material for: Development of Insulin Detemir/Insulin Aspart Cross-Reacting Antibodies Following Treatment with Insulin Detemir: 104-week Study in Children and Adolescents with Type 1 Diabetes Aged 2–16 Years
Source: PubMed Central journal article supplement — Diabetes Ther. 2016 Sep 6;7(4):713–24. doi: 10.1007/s13300-016-0196-5 (PMC5118234; doi:10.1007/s13300-016-0196-5), 2016-09-06
Supplement: 13300_2016_196_MOESM1_ESM.pdf [file 13300_2016_196_MOESM1_ESM.pdf]

**Supplementary Table 1.** Summary of all hypoglycaemic episodes over the total treatment period for children participating in the extension trial.

|                   | 2–5 years of age |      |      |       | 6–12 years of age |      |      |       | 13–16 years of age |      |      |       | Total |      |       |       |
|-------------------|------------------|------|------|-------|-------------------|------|------|-------|--------------------|------|------|-------|-------|------|-------|-------|
|                   | N                | %    | E    | R     | N                 | %    | E    | R     | N                  | %    | E    | R     | N     | %    | E     | R     |
| All 24-h episodes | 37               | 100  | 4028 | 55.00 | 59                | 100  | 7438 | 63.28 | 49                 | 98.0 | 4608 | 46.81 | 145   | 99.3 | 16074 | 55.58 |
| Diurnal           | 36               | 97.3 | 3466 | 47.33 | 59                | 100  | 6359 | 54.10 | 49                 | 98.0 | 3780 | 38.40 | 144   | 98.6 | 13605 | 47.04 |
| Nocturnal         | 34               | 91.9 | 562  | 7.68  | 56                | 94.9 | 1079 | 9.18  | 45                 | 90.0 | 828  | 8.41  | 135   | 92.5 | 2469  | 8.54  |
| Severe            | 2                | 5.4  | 2    | 0.03  | 2                 | 3.4  | 2    | 0.02  | 2                  | 4.0  | 3    | 0.03  | 6     | 4.1  | 7     | 0.02  |
| Moderate          | 15               | 40.5 | 241  | 3.29  | 9                 | 15.3 | 196  | 1.67  | 4                  | 8.0  | 13   | 0.13  | 28    | 19.2 | 450   | 1.56  |
| Mild              | 30               | 81.1 | 1087 | 14.84 | 59                | 100  | 5922 | 50.39 | 49                 | 98.0 | 3521 | 35.77 | 138   | 94.5 | 10530 | 36.41 |
| Biochemical       | 34               | 91.9 | 2698 | 36.84 | 50                | 84.7 | 1314 | 11.18 | 42                 | 84.0 | 1068 | 10.85 | 126   | 86.3 | 5080  | 17.57 |
| Unclassified      | 0                | 0    | 0    | 0     | 3                 | 5.1  | 4    | 0.03  | 2                  | 4.0  | 3    | 0.03  | 5     | 3.4  | 7     | 0.02  |

%, percentage of patients; E, number of events; N, number of patients; R, events per exposure year.

**Supplementary Table 2.** Adverse events over the total treatment period for children participating in the extension trial.

|                        | 2–5 years of age |      |     |      | 6–12 years of age |      |     |      | 13–16 years of age |      |     |      | Total |      |     |      |
|------------------------|------------------|------|-----|------|-------------------|------|-----|------|--------------------|------|-----|------|-------|------|-----|------|
|                        | N                | %    | E   | R    | N                 | %    | E   | R    | N                  | %    | E   | R    | N     | %    | E   | R    |
| Serious adverse events | 3                | 8.1  | 4   | 0.06 | 6                 | 10.2 | 9   | 0.08 | 3                  | 6.0  | 4   | 0.04 | 12    | 8.2  | 17  | 0.06 |
| All adverse events     | 29               | 78.4 | 178 | 2.43 | 50                | 84.7 | 383 | 3.26 | 37                 | 74.0 | 153 | 1.55 | 116   | 79.5 | 714 | 2.47 |
| Severe                 | 2                | 5.4  | 2   | 0.03 | 5                 | 8.5  | 7   | 0.06 | 1                  | 2.0  | 2   | 0.02 | 8     | 5.5  | 11  | 0.04 |
| Moderate               | 11               | 29.7 | 20  | 0.27 | 21                | 35.6 | 50  | 0.43 | 9                  | 18.0 | 13  | 0.13 | 41    | 28.1 | 83  | 0.29 |
| Mild                   | 29               | 78.4 | 156 | 2.13 | 47                | 79.7 | 326 | 2.77 | 34                 | 68.0 | 138 | 1.40 | 110   | 75.3 | 620 | 2.14 |
| Relation to IDet       |                  |      |     |      |                   |      |     |      |                    |      |     |      |       |      |     |      |
| Possible               | 3                | 8.1  | 5   | 0.07 | 5                 | 8.5  | 6   | 0.05 | 1                  | 2.0  | 2   | 0.02 | 9     | 6.2  | 13  | 0.05 |
| Probable               | 1                | 2.7  | 1   | 0.01 | 3                 | 5.1  | 4   | 0.03 | 5                  | 10.0 | 5   | 0.05 | 9     | 6.2  | 10  | 0.04 |
| Unlikely               | 29               | 78.4 | 172 | 2.35 | 50                | 84.7 | 373 | 3.17 | 35                 | 70.0 | 146 | 1.48 | 114   | 78.1 | 691 | 2.39 |
| Relation to IAsp       |                  |      |     |      |                   |      |     |      |                    |      |     |      |       |      |     |      |
| Possible               | 3                | 8.1  | 4   | 0.06 | 5                 | 8.5  | 6   | 0.05 | 1                  | 2.0  | 1   | 0.01 | 9     | 6.2  | 11  | 0.04 |
| Probable               | 4                | 10.8 | 5   | 0.07 | 4                 | 6.8  | 4   | 0.03 | 1                  | 2.0  | 1   | 0.01 | 9     | 6.2  | 10  | 0.04 |

|          |    |      |     |      |    |      |     |      |    |      |     |      |     |      |     |      |
|----------|----|------|-----|------|----|------|-----|------|----|------|-----|------|-----|------|-----|------|
| Unlikely | 29 | 78.4 | 169 | 2.31 | 49 | 83.1 | 373 | 3.17 | 37 | 74.0 | 151 | 1.53 | 115 | 78.8 | 693 | 2.40 |
|----------|----|------|-----|------|----|------|-----|------|----|------|-----|------|-----|------|-----|------|

%, percentage of patients; E, number of events; IAsp, insulin aspart; IDet, insulin detemir; N, number of patients; R, events per exposure year
